# Supplementary material for: Oral levosimendan in amyotrophic lateral sclerosis: a phase II multicentre, randomised, double-blind, placebo-controlled trial
Source: PubMed Central journal article supplement — J Neurol Neurosurg Psychiatry. 2019 Jul 17;90(10):1165–70. doi: 10.1136/jnnp-2018-320288 (PMC6817985; doi:10.1136/jnnp-2018-320288), 2019-07-17
Supplement: jnnp-2018-320288supp002.pdf [file jnnp-2018-320288supp002.pdf]

Online Supplemental Figure 1. Study design. Double-blind part consisting of three 14-day cross-over treatment periods separated by 19-23 –day wash-out periods. Visits at day 1, 5 and 14 of each treatment period. Six-month open-label follow-up with visits at 1, 3 and 6 months.

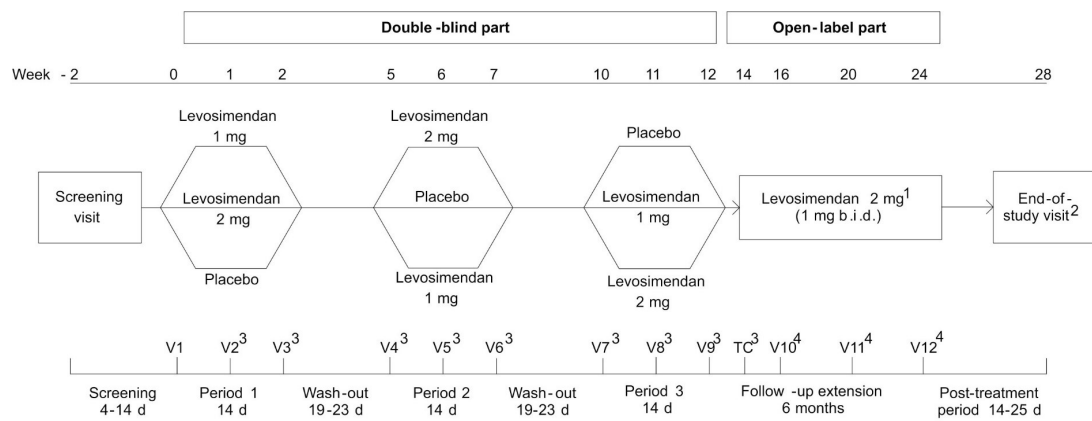

TC = telephone contact

- 1 1 mg in the morning for first 2 weeks
- 2 14 -25 d after last study treatment intake
- 3  $\pm$  2 days
- 4  $\pm$  7 days
