# Supplementary material for: Oral levosimendan in amyotrophic lateral sclerosis: a phase II multicentre, randomised, double-blind, placebo-controlled trial
Source: PubMed Central journal article supplement — J Neurol Neurosurg Psychiatry. 2019 Jul 17;90(10):1165–70. doi: 10.1136/jnnp-2018-320288 (PMC6817985; doi:10.1136/jnnp-2018-320288), 2019-07-17

Online supplementary figure 2. SVC (percent of predicted normal) measured in the supine position with original baseline definition. Change from baseline (period 1 day 1) in percent predicted SVC is shown for all three 14-day cross-over treatment periods separately.

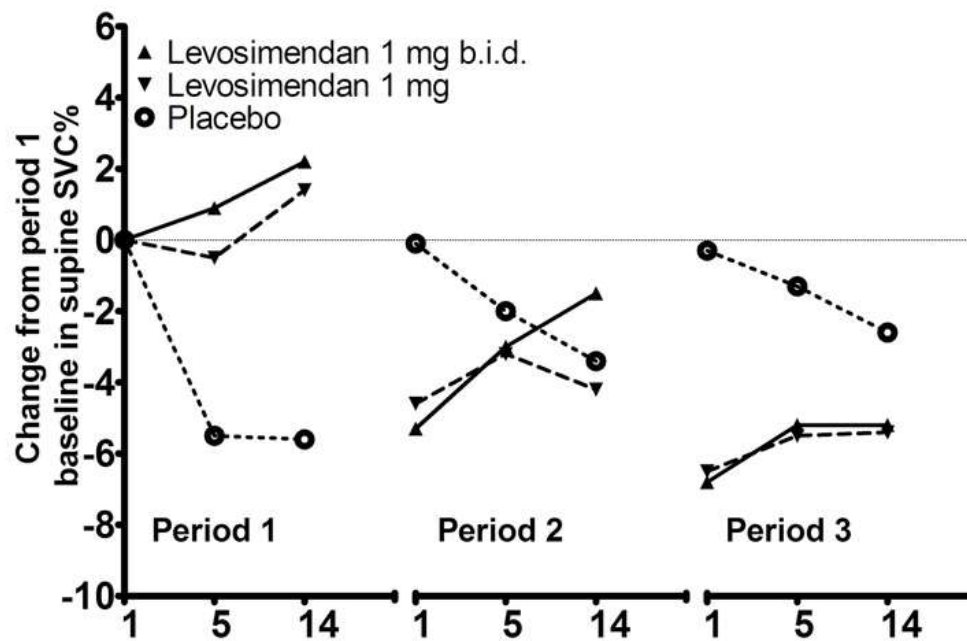

Supplement: jnnp-2018-320288supp003.pdf [file jnnp-2018-320288supp003.pdf]
