# Supplementary material for: Oral levosimendan in amyotrophic lateral sclerosis: a phase II multicentre, randomised, double-blind, placebo-controlled trial
Source: PubMed Central journal article supplement — J Neurol Neurosurg Psychiatry. 2019 Jul 17;90(10):1165–70. doi: 10.1136/jnnp-2018-320288 (PMC6817985; doi:10.1136/jnnp-2018-320288), 2019-07-17
Supplement: jnnp-2018-320288supp005.pdf [file jnnp-2018-320288supp005.pdf]

Online supplementary table 2. Study event table

| Protocol activities                                  | Screening period | Double-blind crossover part<br>Visits/each treatment period |                |                | Open-label<br>Follow-up extension |                |                |                | Post-treatment period |
|------------------------------------------------------|------------------|-------------------------------------------------------------|----------------|----------------|-----------------------------------|----------------|----------------|----------------|-----------------------|
|                                                      | Screening visit  | Baseline<br>Day 1 pre-dose                                  | Day 5 ± 2      | Day 14 ± 2     | TC<br>Week 2                      | Month 1        | Month 3        | Month 6        | End-of-study visit    |
| IC                                                   | x                |                                                             |                |                |                                   |                |                |                |                       |
| Demography and substance use                         | x                |                                                             |                |                |                                   |                |                |                |                       |
| Physical examination                                 | x                | x                                                           |                | x              |                                   |                |                |                | x                     |
| Weight                                               | x                | x                                                           | x              | x              |                                   |                |                |                | x                     |
| Height and BMI                                       | x                |                                                             |                |                |                                   |                |                |                |                       |
| Daytime oxygen saturation (SpO <sub>2</sub> )        | x                |                                                             |                |                |                                   |                |                |                |                       |
| HR and BP                                            | x                | x                                                           | x              | x              |                                   | x              | x              | x              | x                     |
| 12-lead ECG                                          | x                | x <sup>1</sup>                                              | x              | x              |                                   | x              | x              | x              | x                     |
| Laboratory safety assessments                        |                  |                                                             |                |                |                                   |                |                |                |                       |
| Haematology                                          | x                | x                                                           |                | x              |                                   | x              | x              | x              | x                     |
| Chemistry                                            | x                | x <sup>2</sup>                                              |                | x <sup>2</sup> |                                   | x <sup>2</sup> | x <sup>2</sup> | x <sup>2</sup> | x <sup>2</sup>        |
| Urinalysis                                           | x                | x                                                           |                | x              |                                   | x              | x              | x              | x                     |
| Serology                                             | x                |                                                             |                |                |                                   |                |                |                |                       |
| Testing ability to swallow capsules                  | x                |                                                             |                |                |                                   |                |                |                |                       |
| Pregnancy test for females of childbearing potential | x                | x                                                           |                |                |                                   |                | x              |                | x                     |
| 24-hour Holter ECG                                   | x                |                                                             |                | x              |                                   |                |                |                |                       |
| Eligibility criteria and decision of entry           | x                |                                                             |                |                |                                   |                |                |                |                       |
| Study treatment                                      |                  | x                                                           |                |                |                                   |                |                |                |                       |
| SVC                                                  | x <sup>3</sup>   | x <sup>4</sup>                                              | x <sup>4</sup> | x <sup>4</sup> |                                   | x <sup>4</sup> | x <sup>4</sup> | x <sup>4</sup> |                       |

|                                                                                                               |  |                |   |   |  |   |   |   |  |
|---------------------------------------------------------------------------------------------------------------|--|----------------|---|---|--|---|---|---|--|
| SNP                                                                                                           |  | x              | x | x |  | x | x | x |  |
| Overnight oxygen saturation (SpO2)                                                                            |  | x              | x | x |  | x | x | x |  |
| Maximal grip strength and submaximal grip strength endurance                                                  |  | x              | x | x |  |   |   |   |  |
| CGI-C                                                                                                         |  |                | x | x |  |   |   |   |  |
| VAS addressing fatigue                                                                                        |  | x              | x | x |  |   |   |   |  |
| EQ-5D-5L                                                                                                      |  | x              |   | x |  | x | x | x |  |
| ALSFRS-R scoring                                                                                              |  | x              |   | x |  | x | x | x |  |
| SF-36                                                                                                         |  | x              |   | x |  | x | x | x |  |
| Blood sampling for levosimendan PK                                                                            |  | x <sup>5</sup> | x | x |  |   |   |   |  |
| Blood sampling for riluzole concentration                                                                     |  | x              |   | x |  |   |   |   |  |
| Blood sample for exploratory biomarkers                                                                       |  | x              |   |   |  | x |   | x |  |
| Blood sample for PG                                                                                           |  | x <sup>6</sup> |   |   |  |   |   |   |  |
| Non-invasive ventilator support, permanent continuous ventilator dependence, tracheostomy and survival status |  | x              |   |   |  |   |   |   |  |
| Medical history and current medical conditions                                                                |  | x              |   |   |  |   |   |   |  |
| AEs and SAEs                                                                                                  |  | x              |   |   |  |   |   |   |  |
| Concomitant treatments                                                                                        |  | x              |   |   |  |   |   |   |  |

TC = telephone contact; BMI = body mass index; CGI-C = Clinical Global Impression of Change; VAS = visual analogue scale; EQ-5D-5L = European Quality of Life Five Dimension Five Level Scale; SF-36 = Short-form health survey; PK = pharmacokinetics; PG = pharmacogenomics; SAE =

<sup>1</sup> 3 baseline recordings

<sup>2</sup> Except thyroid-stimulating hormone (TSH)

<sup>3</sup> Only in sitting position

<sup>4</sup> In sitting and supine position

<sup>5</sup> No pre-dose sample during the 1<sup>st</sup> treatment period

<sup>6</sup> One sample preferably during visit 1 of the 1<sup>st</sup> treatment period
