# Supplementary material for: Oral levosimendan in amyotrophic lateral sclerosis: a phase II multicentre, randomised, double-blind, placebo-controlled trial
Source: PubMed Central journal article supplement — J Neurol Neurosurg Psychiatry. 2019 Jul 17;90(10):1165–70. doi: 10.1136/jnnp-2018-320288 (PMC6817985; doi:10.1136/jnnp-2018-320288), 2019-07-17
Supplement: jnnp-2018-320288supp006.pdf [file jnnp-2018-320288supp006.pdf]

Online supplementary table 3. Plasma concentrations of levosimendan metabolites OR-1855 and OR-1896 (by acetylation status) prior to the study treatment intake in the morning of day 14 of a crossover study period.

| Acetylation status                  | Levosimendan daily dose |                 | 1 mg            |                 | 1 mg bd         |                 |
|-------------------------------------|-------------------------|-----------------|-----------------|-----------------|-----------------|-----------------|
|                                     | Analyte                 | OR-1855 (ng/ml) | OR-1896 (ng/ml) | OR-1855 (ng/ml) | OR-1896 (ng/ml) | OR-1896 (ng/ml) |
| Slow acetylators                    | N                       | 16              | 16              | 15              | 15              |                 |
|                                     | Mean (SD)               | 1.82 (0.91)     | 1.10 (0.52)     | 3.72 (2.67)     | 2.24 (1.29)     |                 |
| Slow (or intermediate) acetylators  | N                       | 14              | 14              | 11              | 11              |                 |
|                                     | Mean (SD)               | 1.69 (1.11)     | 1.21 (0.51)     | 4.59 (1.84)     | 2.60 (1.08)     |                 |
| Intermediate (or rapid) acetylators | N                       | 23              | 23              | 23              | 23              |                 |
|                                     | Mean (SD)               | 0.80 (0.47)     | 1.82 (0.94)     | 2.09 (1.16)     | 4.55 (1.97)     |                 |
| Rapid acetylators                   | N                       | 3               | 3               | 3               | 3               |                 |
|                                     | Mean (SD)               | 0.82 (0.26)     | 3.01 (0.32)     | 1.80 (0.66)     | 6.18 (0.47)     |                 |
| Status unavailable                  | N                       | 2               | 2               | 3               | 3               |                 |
|                                     | Mean (SD)               | 2.08 (1.70)     | 3.01 (1.05)     | 7.14 (4.82)     | 16.1 (4.20)     |                 |
| All                                 | N                       | 58              | 58              | 55              | 55              |                 |
|                                     | Mean (SD)               | 1.34 (0.94)     | 1.58 (0.89)     | 3.30 (2.42)     | 4.25 (3.56)     |                 |
